# Supplementary material for: Performance of Computer-Aided Detection and Quality of Bowel Preparation: A Comprehensive Analysis of Colonoscopy Outcomes
Source: Research Square preprint supplement (doi:10.21203/rs.3.rs-4889346/v1), 2024-10-02
Supplement: Supplementary file 1 [file 980f4e5ae6801032f458aa31.docx]

**Supplement table 1. Table of general characteristics and outcomes of all adequately prepped colonoscopies, complete case analysis (n=3978).**

|  | **No CADe** | **CADe** | **Total** | **p-value** |
| --- | --- | --- | --- | --- |
|  | N=2,514 | N=1,464 | N=3,978 |  |
| Age | 55.6 (13.0) | 56.9 (10.9) | 56.1 (12.3) | **<0.001** |
| Gender |  |  |  | **0.061** |
| Female | 1,426 (56.7%) | 875 (59.8%) | 2,301 (57.8%) |  |
| Male | 1,088 (43.3%) | 589 (40.2%) | 1,677 (42.2%) |  |
| Race |  |  |  | **0.048** |
| White | 1,399 (55.7%) | 756 (51.6%) | 2,155 (54.2%) |  |
| Black | 887 (35.3%) | 563 (38.5%) | 1,450 (36.5%) |  |
| Other | 227 ( 9.0%) | 145 ( 9.9%) | 372 ( 9.4%) |  |
| Withdrawal time (min), mean (SD) | 11.58 (7.60) | 13.52 (6.60) | 12.30 (7.31) | <0.001 |
| Total Procedure Duration (min), mean (SD) | 18.73 (9.11) | 19.44 (8.02) | 18.99 (8.73) | 0.013 |
| Yield of Colonoscopy |  |  |  |  |
| Any Polyp | 1,217 (48.4%) | 980 (66.9%) | 2,197 (55.2%) | **<0.001** |
| Polyp Size (mm), mean (SD) | 4.4 (3.2) | 3.9 (2.3) | 4.2 (2.8) | **<0.001** |
| Number of Polyps Retrieved | 1.1 (2.0) | 1.8 (2.2) | 1.3 (2.1) | **<0.001** |
| Diminutive Polyps (<5mm) | 961 (79.9%) | 834 (85.4%) | 1,795 (82.3%) | **<0.001** |
| Hyperplastic Polyps | 279 (18.7%) | 259 (25.1%) | 538 (21.3%) | **<0.001** |
| Adenoma Present | 856 (34.0%) | 704 (48.1%) | 1,560 (39.2%) | **<0.001** |
| Number of TA's |  |  |  |  |
| 1-2 TAs | 569 (38.2%) | 459 (44.5%) | 1,028 (40.8%) | **0.001** |
| 3-10 TAs | 198 (13.3%) | 203 (19.7%) | 401 (15.9%) | **<0.001** |
| >10 TAs | 10 ( 0.7%) | 9 ( 0.9%) | 19 ( 0.8%) | 0.56 |
| Advanced Neoplasm | 207 ( 8.2%) | 104 ( 7.1%) | 311 ( 7.8%) | 0.2 |
| Adenocarcinoma | 12 ( 0.5%) | 4 ( 0.3%) | 16 ( 0.4%) | 0.33 |
| Sessile Polyp Present | 113 ( 7.6%) | 120 (11.6%) | 233 ( 9.2%) | **<0.001** |
| SSP < 1 CM | 91 ( 6.1%) | 99 ( 9.6%) | 190 ( 7.5%) | **0.001** |
| SSP > 1 CM | 36 ( 2.4%) | 31 ( 3.0%) | 67 ( 2.7%) | 0.36 |

Footnote: CADe - Computer Aided Detection; TA - Tubular Adenoma; p-values were calculated using t-test for continuous variables , chi-square test for categorical variables; N - Number of patients; SD - Standard Deviation. The values in parentheses represent the range or percentage where applicable. Significance level set at p < 0.05.

**Supplement table 2. Table of general characteristics and outcomes adequately prepped average risk screening colonoscopies (n=3978).**

|  | **No CADe** | **CADe** | **Total** | **p-value** |
| --- | --- | --- | --- | --- |
|  | N=2,880 | N=1,594 | N=4,474 |  |
| Age | 55.7 (13.0) | 57.2(10.9) | 56.2 (12.3) | <0.001 |
| Gender |  |  |  | 0.064 |
| Female | 1,609 (56.0%) | 930 (58.9%) | 2,539 (57.0%) |  |
| Male | 1,263 (44.0%) | 649 (41.1%) | 1,912 (43.0%) |  |
| Race |  |  |  | 0.052 |
| White | 1,570 (54.5%) | 811 (50.9%) | 2,381 (53.2%) |  |
| Black | 1,058 (36.7%) | 624 (39.1%) | 1,682 (37.6%) |  |
| Other | 251 ( 8.7%) | 159 (10.0%) | 410 ( 9.2%) |  |
| Withdrawal time (min), mean (SD) | 11.05 (7.75) | 13.38 (6.83) | 11.88 (7.52) | <0.001 |
| Total Procedure Duration (min), mean (SD) | 18.18 (9.34) | 19.37 (8.22) | 18.60 (8.97) | <0.001 |
| Yield of Colonoscopy |  |  |  |  |
| Any Polyp | 1,340 (46.5%) | 1,068 (67.0%) | 2,408 (53.8%) | <0.001 |
| Polyp Size (mm), mean (SD) | 4.5 (3.3) | 4.0 (2.6) | 4.2 (3.0) | <0.001 |
| Number of Polyps Retrieved | 1.1 (2.0) | 1.7 (2.2) | 1.3 (2.1) | <0.001 |
| Diminutive Polyps (<5mm) | 1,051 (79.7%) | 910 (85.5%) | 1,961 (82.3%) | <0.001 |
| Hyperplastic Polyps | 299 (18.3%) | 277 (25.1%) | 576 (21.0%) | <0.001 |
| Adenoma Present | 927 (32.2%) | 752 (47.2%) | 1,679 (37.5%) | <0.001 |
| Number of TA's |  |  |  |  |
| 1-2 TAs | 616 (37.7%) | 492 (44.6%) | 1,108 (40.4%) | <0.001 |
| 3-10 TAs | 212 (13.0%) | 217 (19.7%) | 429 (15.7%) | <0.001 |
| >10 TAs | 12 ( 0.7%) | 9 ( 0.8%) | 21 ( 0.8%) | 0.81 |
| Advanced Neoplasm | 222 ( 7.7%) | 111 ( 7.0%) | 333 ( 7.4%) | 0.36 |
| Adenocarcinoma | 14 ( 0.5%) | 6 ( 0.4%) | 20 ( 0.4%) | 0.6 |
| Sessile Polyp Present | 119 ( 7.3%) | 129 (11.7%) | 248 ( 9.1%) | <0.001 |
| SSP < 1 CM | 94 ( 5.7%) | 108 ( 9.8%) | 202 ( 7.4%) | <0.001 |
| SSP > 1 CM | 39 ( 2.4%) | 32 ( 2.9%) | 71 ( 2.6%) | 0.41 |

Footnote: CADe - Computer Aided Detection; TA - Tubular Adenoma; p-values were calculated using t-test for continuous variables , chi-square test for categorical variables; N - Number of patients; SD - Standard Deviation. The values in parentheses represent the range or percentage where applicable. Significance level set at p < 0.05.

**Supplement table 3. Table of general characteristics and outcomes of all inadequately prepped colonoscopies, complete case analysis (n=473).**

|  | **No CADe** | **CADe** | **Total** | **p-value** |
| --- | --- | --- | --- | --- |
|  | N=358 | N=115 | N=473 |  |
| Age | 56.4 (13.1) | 60.3 (10.2) | 57.49 (12.6) | 0.004 |
| Gender |  |  |  | 0.54 |
| Female | 183 (51.1%) | 55 (47.8%) | 238 (50.3%) |  |
| Male | 175 (48.9%) | 60 (52.2%) | 235 (49.7%) |  |
| Race |  |  |  | 0.11 |
| White | 168 (46.9%) | 45 (39.1%) | 213 (45.0%) |  |
| Black | 168 (46.9%) | 57 (49.6%) | 225 (47.6%) |  |
| Other | 22 ( 6.1%) | 13 (11.3%) | 35 ( 7.4%) |  |
| Withdrawal time (min), mean (SD) | 7.25 (7.62) | 11.34 (8.64) | 8.24 (8.06) | <0.001 |
| Total Procedure Duration (min), mean (SD) | 14.28 (10.02) | 18.13 (9.96) | 15.22 (10.13) | <0.001 |
| Yield of Colonoscopy | 115 (32.1%) | 73 (63.5%) | 188 (39.7%) | <0.001 |
| Any Polyp | 4.8 (4.0) | 4.5 (5.0) | 4.7 (4.4) | 0.69 |
| Polyp Size (mm), mean (SD) | 0.69 (1.8) | 1.3 (1.6) | 0.8 (1.8) | <0.001 |
| Number of Polyps Retrieved | 84 (76.4%) | 62 (86.1%) | 146 (80.2%) | 0.11 |
| Diminutive Polyps (<5mm) | 20 (13.9%) | 18 (24.7%) | 38 (17.5%) | 0.049 |
| Hyperplastic Polyps |  |  |  |  |
| Adenoma Present | 71 (19.8%) | 48 (41.7%) | 119 (25.2%) | <0.001 |
| Number of TA's |  |  |  |  |
| 1-2 TAs | 47 (32.6%) | 33 (45.2%) | 80 (36.9%) | 0.07 |
| 3-10 TAs | 14 ( 9.7%) | 14 (19.2%) | 28 (12.9%) | 0.05 |
| >10 TAs | 2 ( 1.4%) | 0 ( 0.0%) | 2 ( 0.9%) | 0.31 |
| Advanced Neoplasm | 15 ( 4.2%) | 7 ( 6.1%) | 22 ( 4.7%) | 0.4 |
| Adenocarcinoma | 2 ( 0.6%) | 2 ( 1.7%) | 4 ( 0.8%) | 0.23 |
| Sessile Polyp Present | 6 ( 4.2%) | 9 (12.3%) | 15 ( 6.9%) | 0.025 |
| SSP < 1 CM | 3 ( 2.1%) | 9 (12.3%) | 12 ( 5.5%) | 0.002 |
| SSP > 1 CM | 3 ( 2.1%) | 1 ( 1.4%) | 4 ( 1.8%) | 0.71 |

Footnote: CADe - Computer Aided Detection; TA - Tubular Adenoma; p-values were calculated using t-test for continuous variables , chi-square test for categorical variables; N - Number of patients; SD - Standard Deviation. The values in parentheses represent the range or percentage where applicable. Significance level set at p < 0.05.

**Supplement table 4. Table of general characteristics and outcomes adequately prepped average risk screening colonoscopies (n=325).**

|  | **No CADe** | **CADe** | **Total** | **p-value** |
| --- | --- | --- | --- | --- |
|  | N=230 | N=95 | N=325 |  |
| Age | 59.4 (10.2) | 60.6 (9.2) | 59.7 (9.9) | 0.3 |
| Gender |  |  |  | 0.31 |
| Female | 116 (50.4%) | 42 (44.2%) | 158 (48.6%) |  |
| Male | 114 (49.6%) | 53 (55.8%) | 167 (51.4%) |  |
| Race |  |  |  | 0.39 |
| White | 92 (40.0%) | 36 (37.9%) | 128 (39.4%) |  |
| Black | 122 (53.0%) | 48 (50.5%) | 170 (52.3%) |  |
| Other | 16 ( 7.0%) | 11 (11.6%) | 27 ( 8.3%) |  |
| Withdrawal time (min), mean (SD) | 6.67 (7.55) | 11.33 (9.12) | 8.03 (8.30) | <0.001 |
| Total Procedure Duration (min), mean (SD) | 13.87 (10.43) | 18.06 (10.47) | 15.09 (10.60) | 0.001 |
| Yield of Colonoscopy | 90 (39.1%) | 60 (63.2%) | 150 (46.2%) | <0.001 |
| Any Polyp | 4.7 (4.1) | 3.8 (2.0) | 4.3 (3.4) | 0.09 |
| Polyp Size (mm), mean (SD) | 0.7 (2.1) | 1.3 (1.6) | 0.9 (1.9) | 0.016 |
| Number of Polyps Retrieved | 65 (75.6%) | 51 (86.4%) | 116 (80.0%) | 0.11 |
| Diminutive Polyps (<5mm) | 15 (18.3%) | 13 (21.7%) | 28 (19.7%) | 0.62 |
| Hyperplastic Polyps |  |  |  |  |
| Adenoma Present | 54 (23.5%) | 40 (42.1%) | 94 (28.9%) | <0.001 |
| Number of TA's |  |  |  |  |
| 1-2 TAs | 35 (42.7%) | 27 (45.0%) | 62 (43.7%) | 0.78 |
| 3-10 TAs | 10 (12.2%) | 12 (20.0%) | 22 (15.5%) | 0.2 |
| >10 TAs | 2 ( 2.4%) | 0 ( 0.0%) | 2 ( 1.4%) | 0.22 |
| Advanced Neoplasm | 13 ( 5.7%) | 5 ( 5.3%) | 18 ( 5.5%) | 0.89 |
| Adenocarcinoma | 1 ( 0.4%) | 0 ( 0.0%) | 1 ( 0.3%) | 0.52 |
| Sessile Polyp Present | 3 ( 3.7%) | 9 (15.0%) | 12 ( 8.5%) | 0.016 |
| SSP < 1 CM | 1 ( 1.2%) | 9 (15.0%) | 10 ( 7.0%) | 0.002 |
| SSP > 1 CM | 2 ( 2.4%) | 1 ( 1.7%) | 3 ( 2.1%) | 0.75 |

Footnote: CADe - Computer Aided Detection; TA - Tubular Adenoma; p-values were calculated using t-test for continuous variables , chi-square test for categorical variables; N - Number of patients; SD - Standard Deviation. The values in parentheses represent the range or percentage where applicable. Significance level set at p < 0.05.
